# Supplementary material for: Influence of carbonaceous species on aqueous photo-catalytic nitrogen fixation by titania
Source: Royal Society of Chemistry journal article supplement (doi:10.1039/c8fd00191j), 2019-01-01
Supplement: c8fd00191j1.pdf [file c8fd00191j1.pdf]

# Supporting Information

## Influence of Carbonaceous Species on Aqueous Photocatalytic Nitrogen Fixation by Titania

Yu-Hsuan Liu<sup>a</sup>, Manh Hiep Vu<sup>b,‡</sup>, JoenHoon Lim<sup>c</sup>, Trong-On Do<sup>b,‡</sup> and Marta C. Hatzell<sup>c\*</sup>

<sup>a</sup> *School of Civil and Environmental Engineering, Georgia Institute of Technology,  
Atlanta, Georgia 30332*

<sup>b,‡</sup> *Department of Chemical Engineering, Laval University, Rue de l'Université, Québec,  
QC G1V 0A6, Canada*

<sup>c\*</sup> *George W. Woodruff School of Mechanical Engineering, Georgia Institute of  
Technology, Atlanta, Georgia 30313*

E-mail: \*marta.hatzell@me.gatech.edu

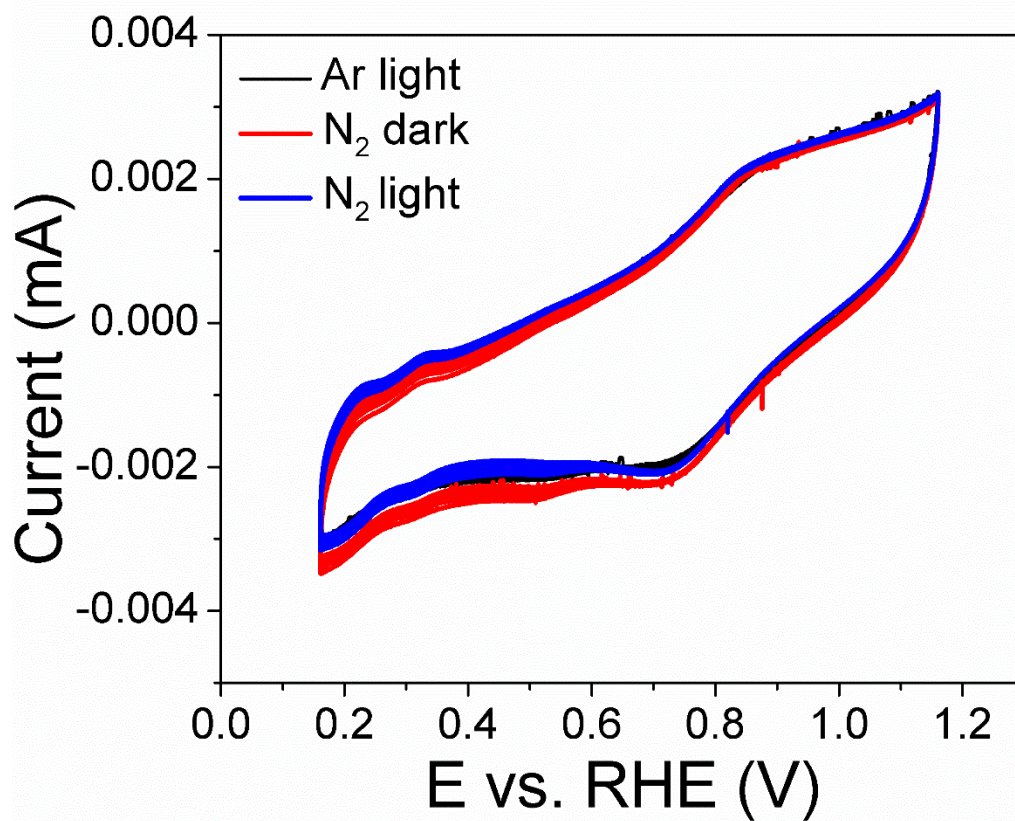

**Fig. S1** Rotating ring disk electrode experiments with and without light illumination in argon and nitrogen atmospheres on Pt disc.

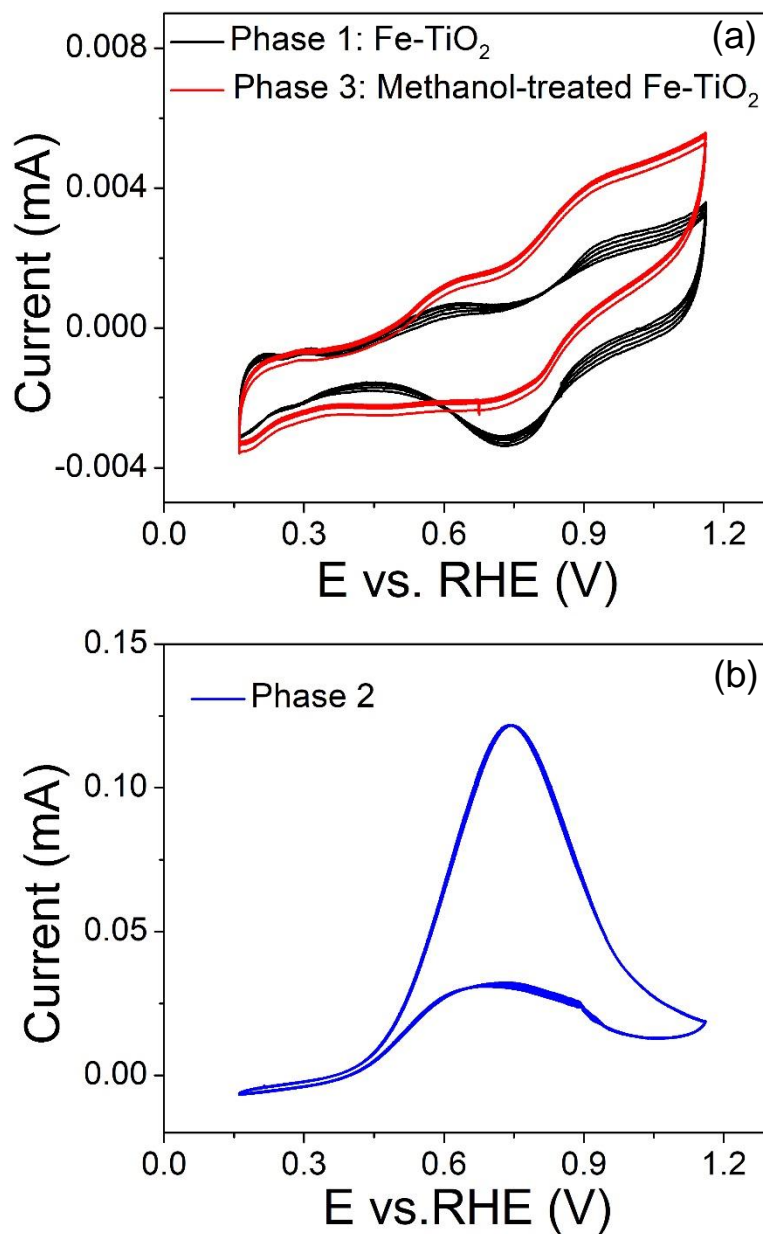

**Fig. S2** Rotating ring disk electrode experiments with light illumination in nitrogen gas on rutile TiO<sub>2</sub> in three phases. Each phase presented the same catalyst by recycling. (a) Comparison of phase 1 and 3. (b) phase 2 with methanol addition

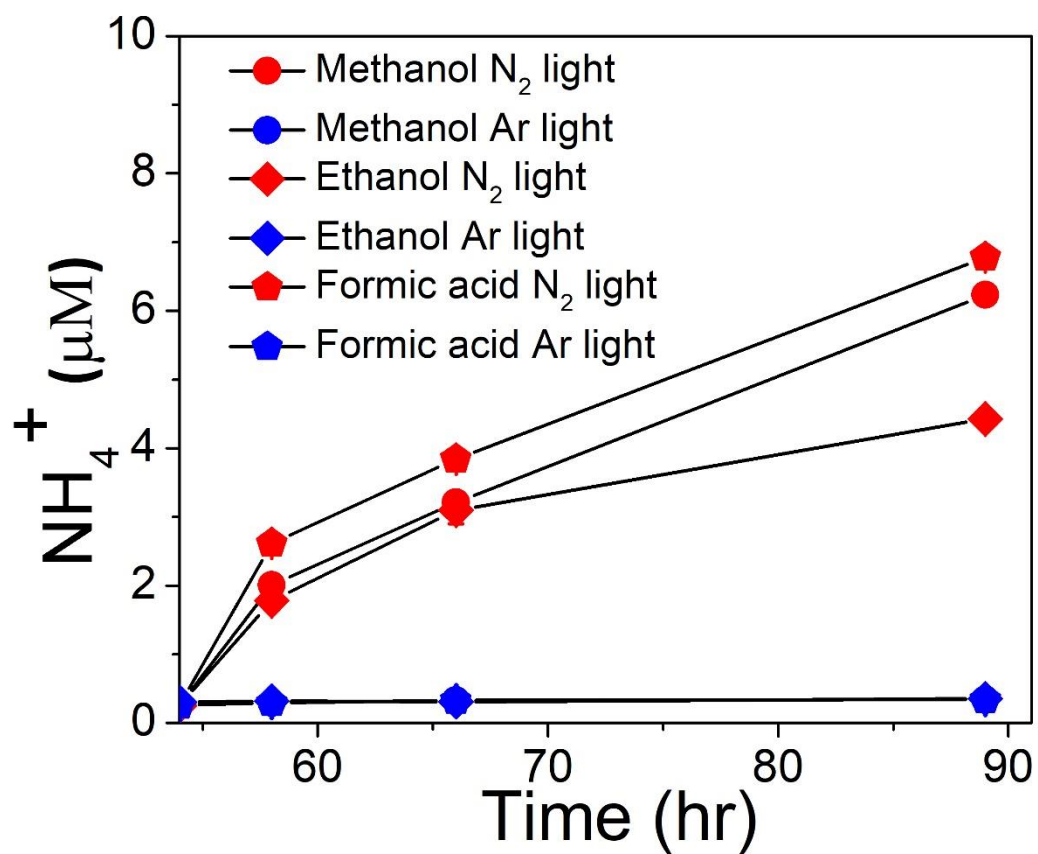

**Fig. S3** Other carbonaceous species effect on photo-catalytic testing by rutile  $\text{TiO}_2$  in phase 3 including methanol, ethanol and formic acid.
